# Supplementary material
Source: PubMed Central journal article supplement (PMC6020145)
Supplement: NIHMS929191-supplement.pdf [file NIHMS929191-supplement.pdf]

## SIC QUALITATIVE INTERVIEW

### **PART 1. The next few questions are about how you found out about the CBITS program and what you did in order to decide to enroll in the program**

#### **Stage 1: Engagement**

1. How did you first learn of the CBITS program? (PROMPTS: presentation @ SBMH Committee, email announcements)
2. What was it about the CBITS program that piqued your interest to learn more?
3. Before engaging in CBITS, did your team or someone else you know have experience with CBITS or another EBP? (PROMPTS TO CLARIFY: at your clinic? Colleagues?) Was there anything about their experience with previously using an EBP that influenced your interest in CBITS?

#### **Stage 2: Consideration of feasibility**

4. What steps or process did you go through at your agency or clinic *BEFORE* signing up for the training in order to determine if CBITS would be feasible or a good fit for you? (PROMPTS: internal meetings, meetings with partners, considering fit for your site)
  - a. Who was involved in making the decision?  
How did the process go?  
How long did that take?
  - b. Were there any barriers when you were deciding about fit and feasibility? Were people on the same page or did it take some negotiation to come to a decision?  
How did you resolve these?
  - c. What were the factors that went into considering whether it was feasible?  
(PROMPTS: staffing, budget issues, funding streams, enough referrals)?

\*\*\*

### **PART 2. Now I would like to ask you a few questions about how your site got “ready” to implement CBITS.**

#### **Stage 3: Readiness planning**

1. How did you get your staff the time and resources to do the training? For example, sites had to buy the manuals, staff needed time to do the web training and attend the in-person training.

*(SAMPLE RESPONSES: Had to seek permission from CEO to buy manuals, allowed use of supervision time, had to do web training at home)*

2. How did you decide which staff would be trained, what schools, eligibility criteria for the program, etc? *(SAMPLE RESPONSES: we asked who wanted to, had some meetings, which principals were open)*
3. One of the big issues that sometimes comes up is billing, what were your clinic's plan for billing for this group treatment? *(SAMPLE RESPONSES: we couldn't bill, we figured another funding stream)*
4. To what extent was your agency or clinic leadership involved in your initial decision-making and readiness process? **(i.e. who, what they did , how they did it?)**

(GENERAL PROMPTS: internal meetings, outside stakeholder meetings, creating of planning documents, criteria for the program; PROBES: What kind of meetings? Who was there? Etc.)

\*\*\*

**PART 3.** The next questions are about your clinic/agency's process of trying to implement CBITS

#### **Stage 4: Staff in place & trained**

5. What was the process for getting your team for CBITS in place?
  - a. Was the team stable or did it change as you went? If it changed, can you describe? (PROBES: did people quit/join in as it went?)
  - b. How long did it take to get the full team for implementing CBITS in place? (PROBES: months, weeks, days)
6. After the CBITS training, how was the decision made for who was actually going to try to implement CBITS? (PROMPT: were you looking for certain criteria?—skills, time for it, etc)
7. After the Fall training, how long did it take to start getting referrals and screening? Or how long did it take to decide to *not implement*? (PROMPT: same school year, a few months later, next school year)

#### **Stage 6: Services and Consultation to Services Begin**

8. Implementation experiences:
  - a. ***Did not implement:*** From my records, I believe your clinic did not end up implementing a group. Is that correct?

Even so, your experience is invaluable to us, and we would be really interested learning more about what challenges you faced and what factors contributed to the decision to not implement? (*Skip questions 12 and 13*)

b. **Did implement:** From my records, I believe someone at your clinic may have implemented a group? Is this correct?  
We would love to hear about what challenges you faced and how you overcame these barriers?

9. Did you or clinicians participate in clinician consultation calls or leadership consultation calls?
  - a. Do you have any feedback about the calls?
  - b. Did you have any challenges with attendance or making time for the calls?

#### **Stage 5: Fidelity monitoring processes in place**

10. Did your clinic consider any process for quality assurance or fidelity monitoring for CBITS?
  - a. If so, what did you do?(PROMPTS: asked the consultant for advice, considered the tools on the website, etc)
  - b. If yes: Was it helpful? How did you use them to inform practice

#### **Stage 7: Model fidelity and staff competence & adherence tracked**

11. Many sites are challenged to track fidelity, adherence, and staff competence when implementing an evidence based practice. Do you have any experience with this either for CBITS or other practices? Can you describe?

\*\*\*

#### **Questions for only clinics that started groups:**

**PART 4.** The following questions are specific about clinicians implementing CBITS

#### **Stage 8: Competency:**

12. Different programs have varying levels of success when implementing a new program. Do you have any thoughts about quality of the CBITS program delivered by your staff? Was there any variability across clinicians? Any challenges related to quality?
13. Did you have the opportunity to track any outcomes for the students?
  - a. If yes, how did you do this?
  - b. Did you get feedback from parents, students, school partners, clinicians?
    - i. If yes, what was it?

\*\*\*

**PART 5.** Finally, I have just a few more quick questions about your clinic's use of other EBPS.

**EBP Information**

14. Are you using any EBPs at your school-based clinic? If so, which one?
15. Are there any EBPs you used and are no longer using?
16. Why did you stop using these EBPs?
